# Supplementary material for: Human In Vivo Metabolism and Elimination Behavior of Micro-Dosed Selective Androgen Receptor Modulator RAD140 for Doping Control Purposes
Source: MDPI journal article supplement (doi:10.3390/metabo12070666), 2022-07-20
Supplement: s1 [file s1]

# Human In Vivo Metabolism and Elimination Behavior of Micro-dosed Selective Androgen Receptor Modulator RAD140 for Doping Control Purposes

Felicitas Wagener<sup>1</sup>, Luisa Euler<sup>1</sup>, Christian Görgens<sup>1</sup>, Sven Guddat<sup>1</sup> and Mario Thevis<sup>1,2,\*</sup>

<sup>1</sup> Institute of Biochemistry/Center for Preventive Doping Research, German Sports University Cologne, Am Sportpark Müngersdorf 6, 50933 Cologne, Germany; f.wagener@biochem.dshs-koeln.de (F.W.); l.euler@biochem.dshs-koeln.de (L.E.); c.goergens@biochem.dshs-koeln.de (C.G.); s.guddat@biochem.dshs-koeln.de (S.G.)

<sup>2</sup> European Monitoring Center for Emerging Doping Agents (EuMoCEDA), 50933 Cologne, Germany

## Supplementary Material

|                                                                                                                                                                                                          |   |
|----------------------------------------------------------------------------------------------------------------------------------------------------------------------------------------------------------|---|
| <b>Figure S1.</b> HRMS/MS spectrum and structure of RAD140 (negative), sample: RDS, urine sample was diluted 1:10 with water and prepared by hydrolysis and LLE. NCE 20%, isolation window $m/z$ 1. .... | 3 |
| <b>Figure S2.</b> HRMS/MS spectrum and structure of RAD140 (positive), sample: RDS, urine sample was diluted 1:10 with water and prepared by hydrolysis and LLE. NCE 20%, isolation window $m/z$ 1. .... | 3 |
| <b>Figure S3.</b> HRMS/MS spectrum and structure of M1, sample: RDS, urine sample was injected directly. NCE 25%, isolation window $m/z$ 1. ....                                                         | 4 |
| <b>Figure S4.</b> HRMS/MS spectrum and postulated structure of M2a, sample: RDS, urine sample was injected directly. NCE 15%, isolation window $m/z$ 1. ....                                             | 4 |
| <b>Figure S5.</b> HRMS/MS spectrum and postulated structure of M2b, sample: RDS, urine sample was injected directly. NCE 20%, isolation window $m/z$ 1. ....                                             | 5 |
| <b>Figure S6.</b> HRMS/MS spectrum and structure of M3, sample: RDS, urine sample was diluted 1:10 with water and prepared by hydrolysis and LLE. NCE 50%, isolation window $m/z$ 1. ....                | 5 |
| <b>Figure S7.</b> HRMS/MS spectrum and postulated structure of M4, sample: RDS, urine sample was injected directly. NCE 15%, isolation window $m/z$ 1. ....                                              | 6 |
| <b>Figure S8.</b> HRMS/MS spectrum and structure of M5, sample: RDS, urine sample was diluted 1:10 with water and prepared by hydrolysis and LLE. NCE 30%, isolation window $m/z$ 1. ....                | 6 |
| <b>Figure S9.</b> HRMS/MS spectrum and postulated structure of M6a, sample: RDS, urine sample was diluted 1:10 with water and prepared by hydrolysis and LLE. NCE 15%, isolation window $m/z$ 1. ....    | 7 |
| <b>Figure S10.</b> HRMS/MS spectrum and postulated structure of M6b, sample: RDS, urine sample was diluted 1:10 with water and prepared by hydrolysis and LLE. NCE 15%, isolation window $m/z$ 1. ....   | 7 |
| <b>Figure S11.</b> HRMS/MS spectrum and postulated structure of M6c, sample: RDS, urine sample was diluted 1:10 with water and prepared by hydrolysis and LLE. NCE 20%, isolation window $m/z$ 1. ....   | 8 |
| <b>Figure S12.</b> HRMS/MS spectrum and postulated structure of M7, sample: RDS, urine sample was injected directly. NCE 25%, isolation window $m/z$ 1. ....                                             | 9 |

---

|                                                                                                                                                                                                                                           |    |
|-------------------------------------------------------------------------------------------------------------------------------------------------------------------------------------------------------------------------------------------|----|
| <b>Figure S13.</b> Chromatograms of RDS (a) after hydrolysis after 1:10 dilution (b) after direct injection. ....                                                                                                                         | 10 |
| <b>Figure S14.</b> Elimination profile of RAD140 after the intake of a single dose of 1 µg RAD140. The black line indicates the average values of the five volunteers, minimum and maximum values are shown as error bars. ....           | 10 |
| <b>Figure S15.</b> Elimination profile of RAD140 after the intake of a single dose of 10 µg RAD140. The black line indicates the average values of the five volunteers, minimum and maximum values are shown as error bars. ....          | 11 |
| <b>Figure S16.</b> Elimination profile of RAD140 after the intake of five doses of 1 µg RAD140 over 5 days. The black line indicates the average values of the five volunteers, minimum and maximum values are shown as error bars. ....  | 11 |
| <b>Figure S17.</b> Elimination profile of RAD140 after the intake of five doses of 10 µg RAD140 over 5 days. The black line indicates the average values of the five volunteers, minimum and maximum values are shown as error bars. .... | 12 |
| <b>Figure S18.</b> Metabolite ratios M6a/M3 of single application of RAD140 (orange) and multi-dose application of RAD140 (blue). Arrows indicate the intake of 50 µg RAD140. ....                                                        | 12 |
| <b>Figure S19.</b> Metabolite ratios M6a/M6b of single application of RAD140 (orange) and multi-dose application of RAD140 (blue). Arrows indicate the intake of 50 µg RAD140. ....                                                       | 13 |
| <b>Figure S20.</b> Metabolite ratios M6a/M6c of single application of RAD140 (orange) and multi-dose application of RAD140 (blue). Arrows indicate the intake of 50 µg RAD140. ....                                                       | 13 |
| <b>Figure S21.</b> Metabolite ratios M6a/RAD140 of single application of RAD140 (orange) and multi-dose application of RAD140 (blue). Arrows indicate the intake of 50 µg RAD140. ....                                                    | 14 |
| <b>Figure S22.</b> Metabolite ratios M6b/M3 of single application of RAD140 (orange) and multi-dose application of RAD140 (blue). Arrows indicate the intake of 50 µg RAD140. ....                                                        | 14 |
| <b>Figure S23.</b> Metabolite ratios M6b/RAD140 of single application of RAD140 (orange) and multi-dose application of RAD140 (blue). Arrows indicate the intake of 50 µg RAD140. ....                                                    | 15 |

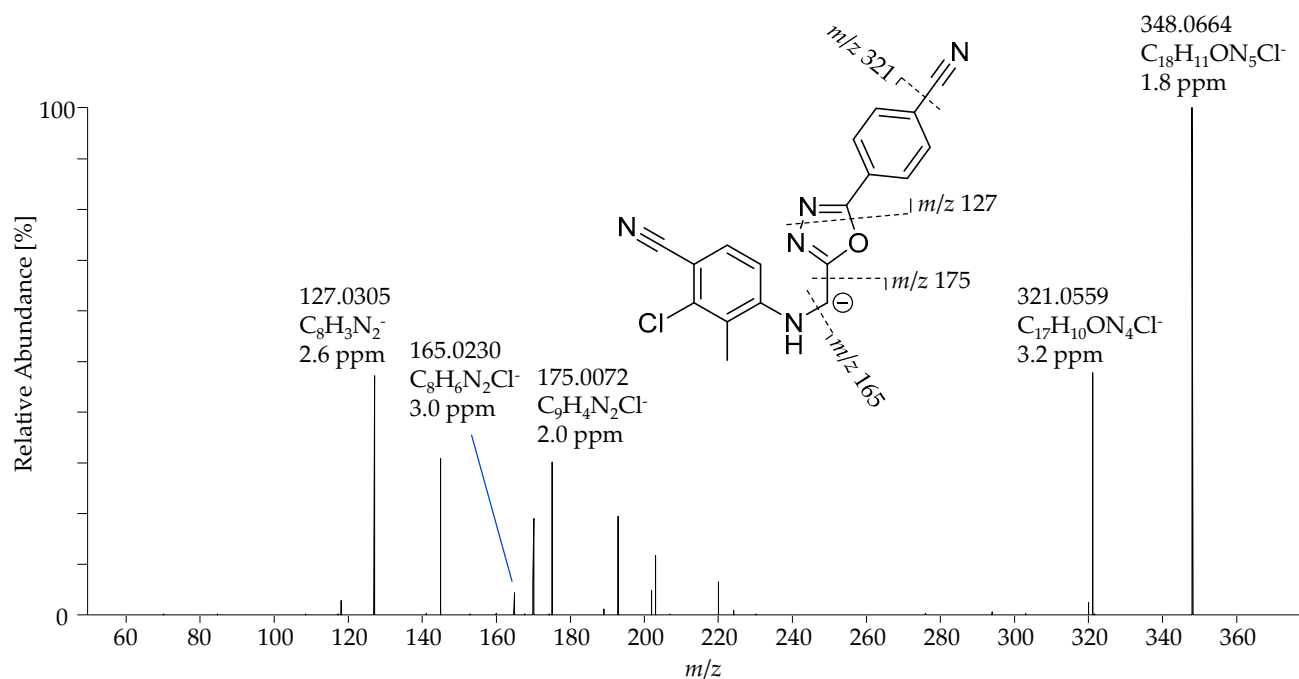

**Figure S1.** HRMS/MS spectrum and structure of RAD140 (negative), sample: RDS, urine sample was diluted 1:10 with water and prepared by hydrolysis and LLE. NCE 20%, isolation window  $m/z$  1.

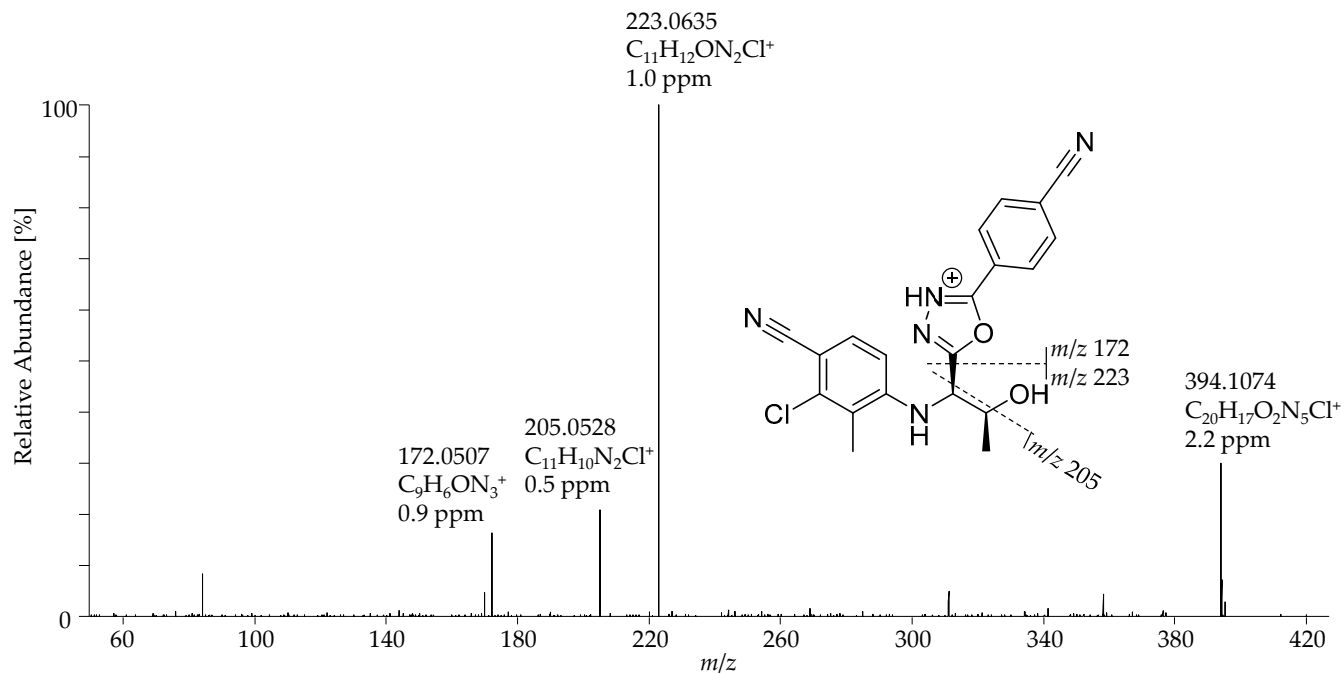

**Figure S2.** HRMS/MS spectrum and structure of RAD140 (positive), sample: RDS, urine sample was diluted 1:10 with water and prepared by hydrolysis and LLE. NCE 20%, isolation window  $m/z$  1.

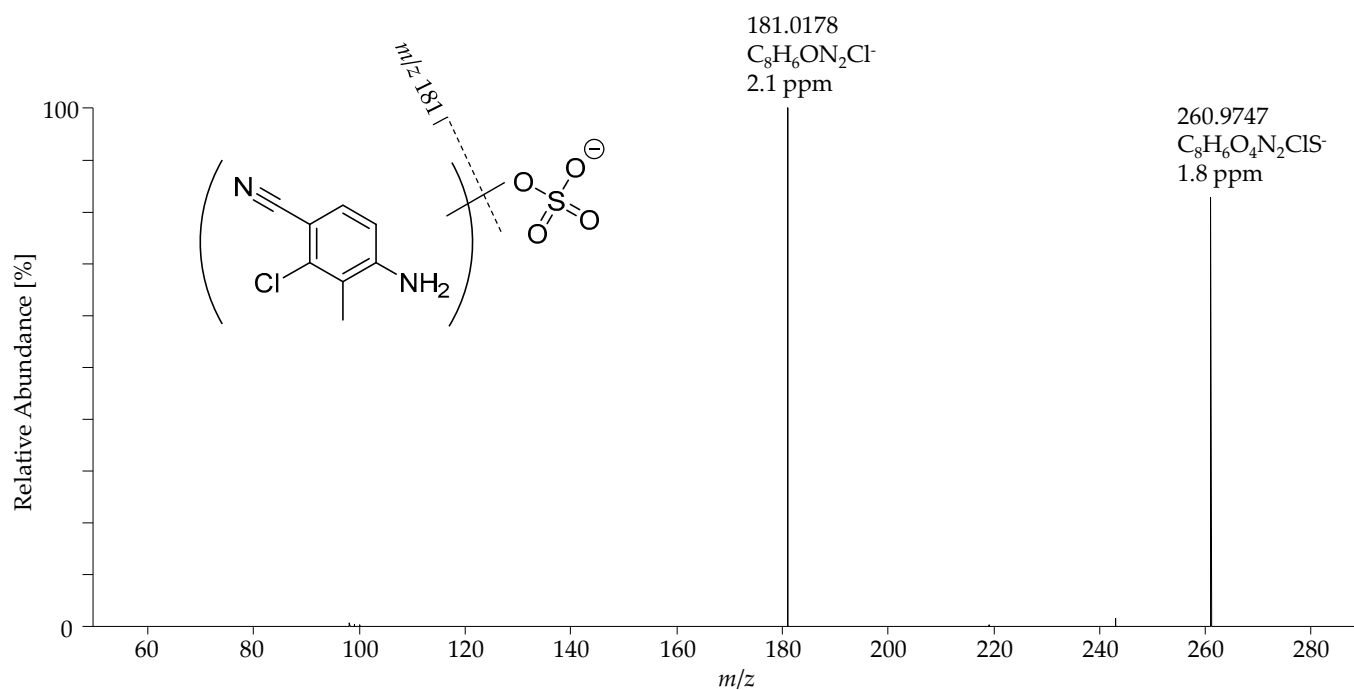

**Figure S3.** HRMS/MS spectrum and structure of M1, sample: RDS, urine sample was injected directly. NCE 25%, isolation window  $m/z$  1.

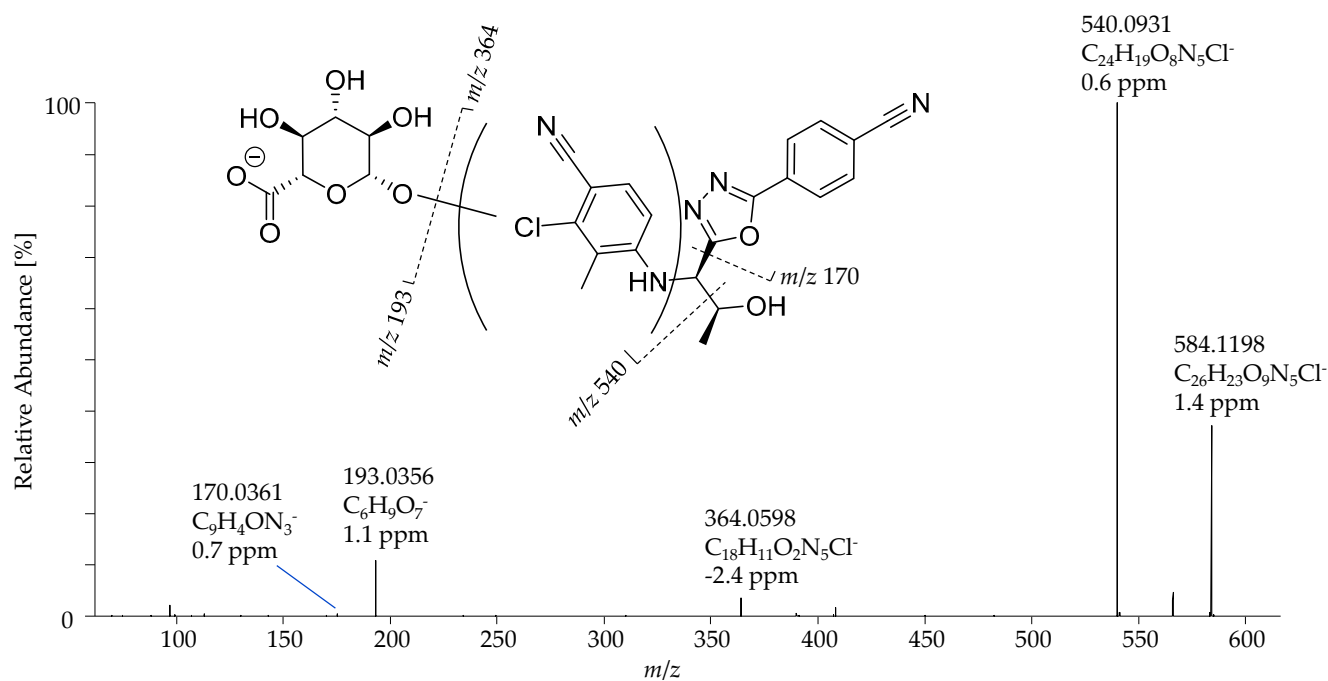

**Figure S4.** HRMS/MS spectrum and postulated structure of M2a, sample: RDS, urine sample was injected directly. NCE 15%, isolation window  $m/z$  1.

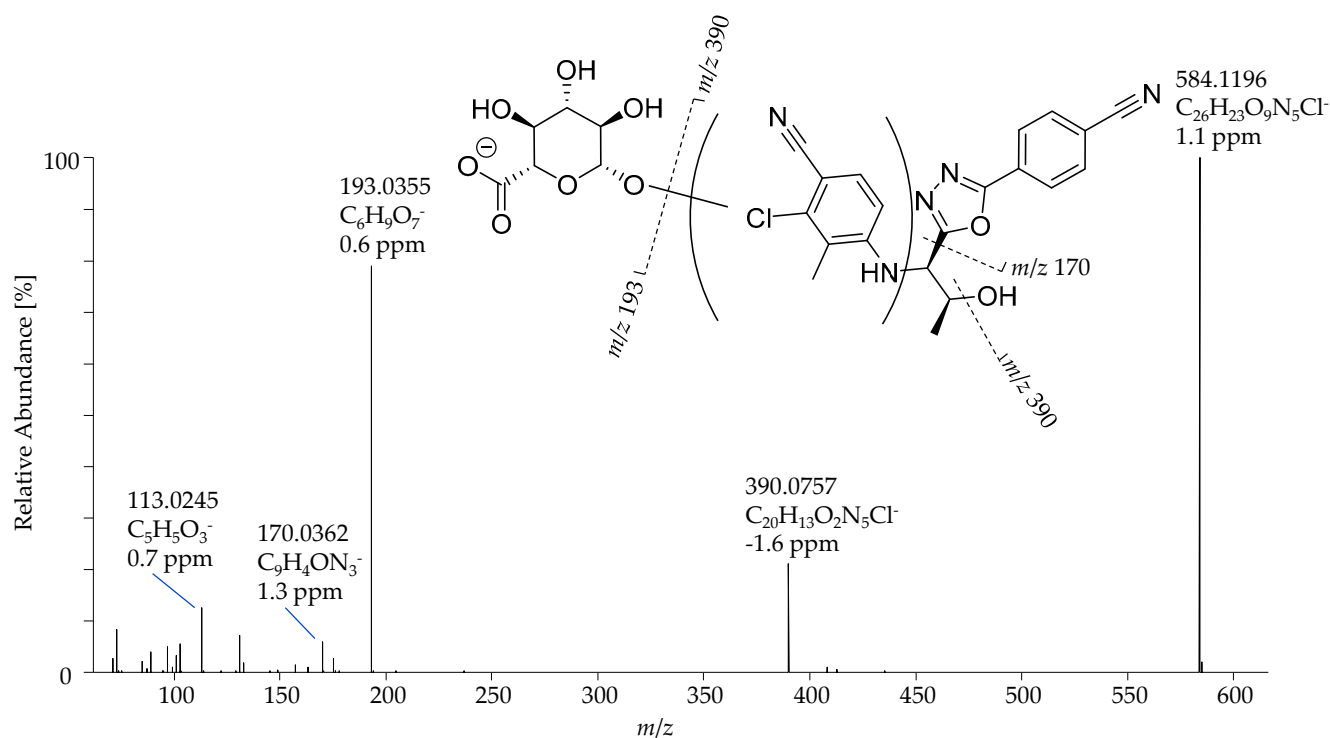

**Figure S5.** HRMS/MS spectrum and postulated structure of M2b, sample: RDS, urine sample was injected directly. NCE 20%, isolation window  $m/z$  1.

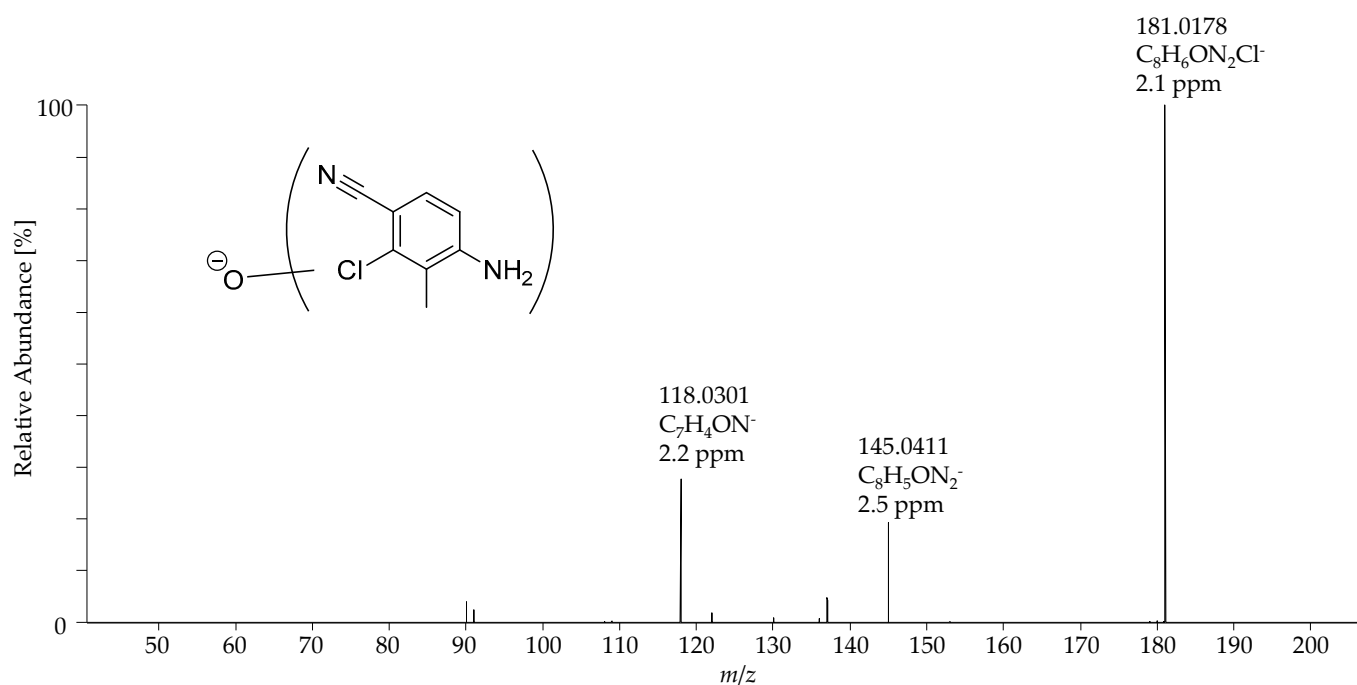

**Figure S6.** HRMS/MS spectrum and structure of M3, sample: RDS, urine sample was diluted 1:10 with water and prepared by hydrolysis and LLE. NCE 50%, isolation window  $m/z$  1.

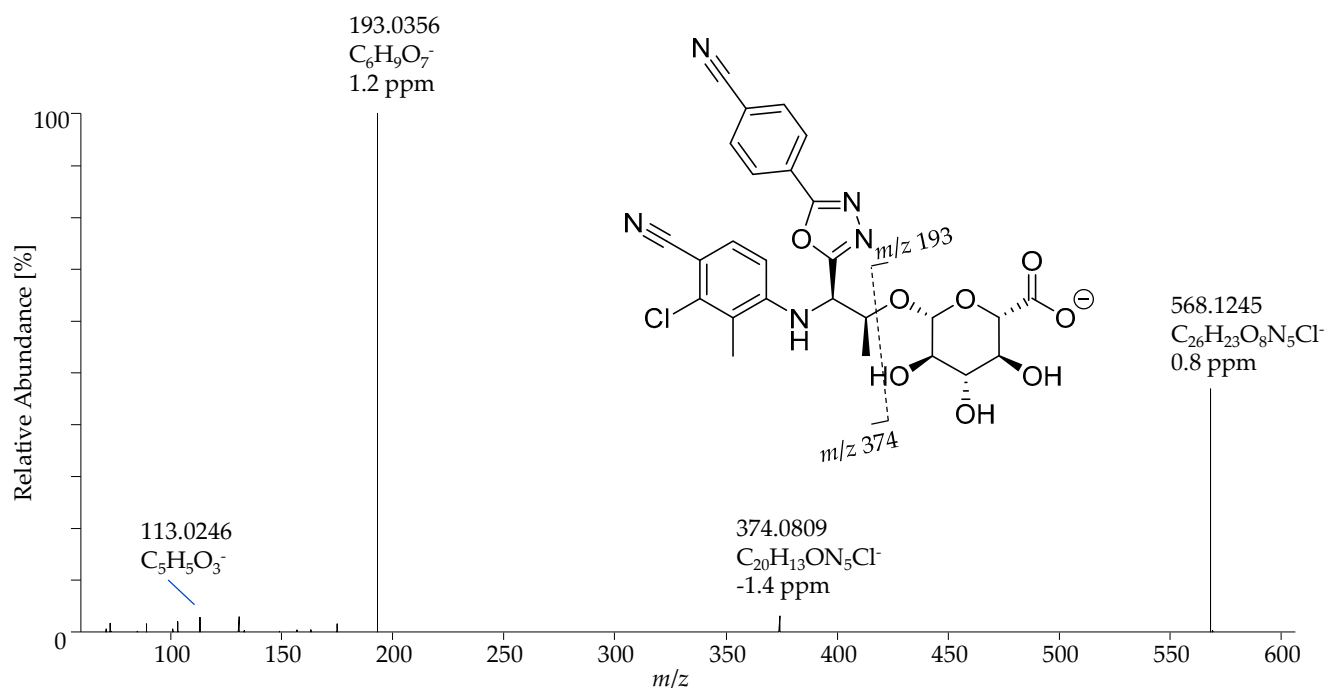

**Figure S7.** HRMS/MS spectrum and postulated structure of M4, sample: RDS, urine sample was injected directly. NCE 15%, isolation window  $m/z$  1.

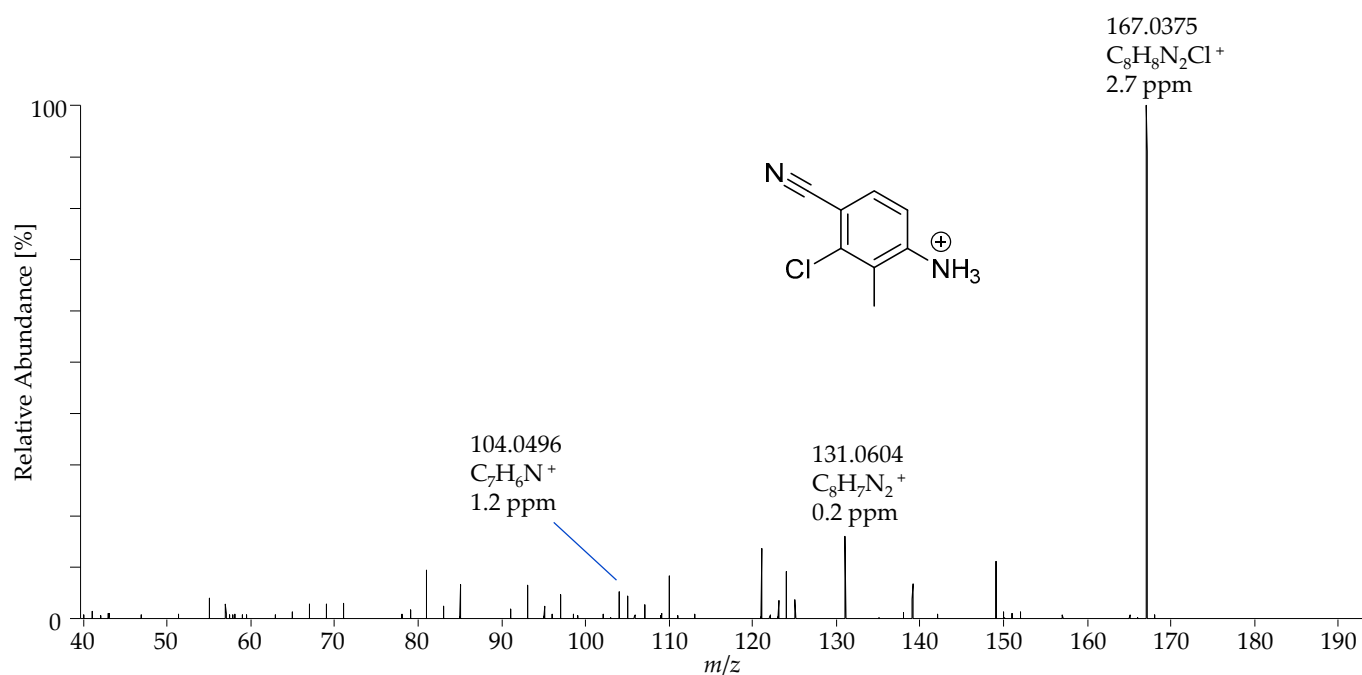

**Figure S8.** HRMS/MS spectrum and structure of M5, sample: RDS, urine sample was diluted 1:10 with water and prepared by hydrolysis and LLE. NCE 30%, isolation window  $m/z$  1.

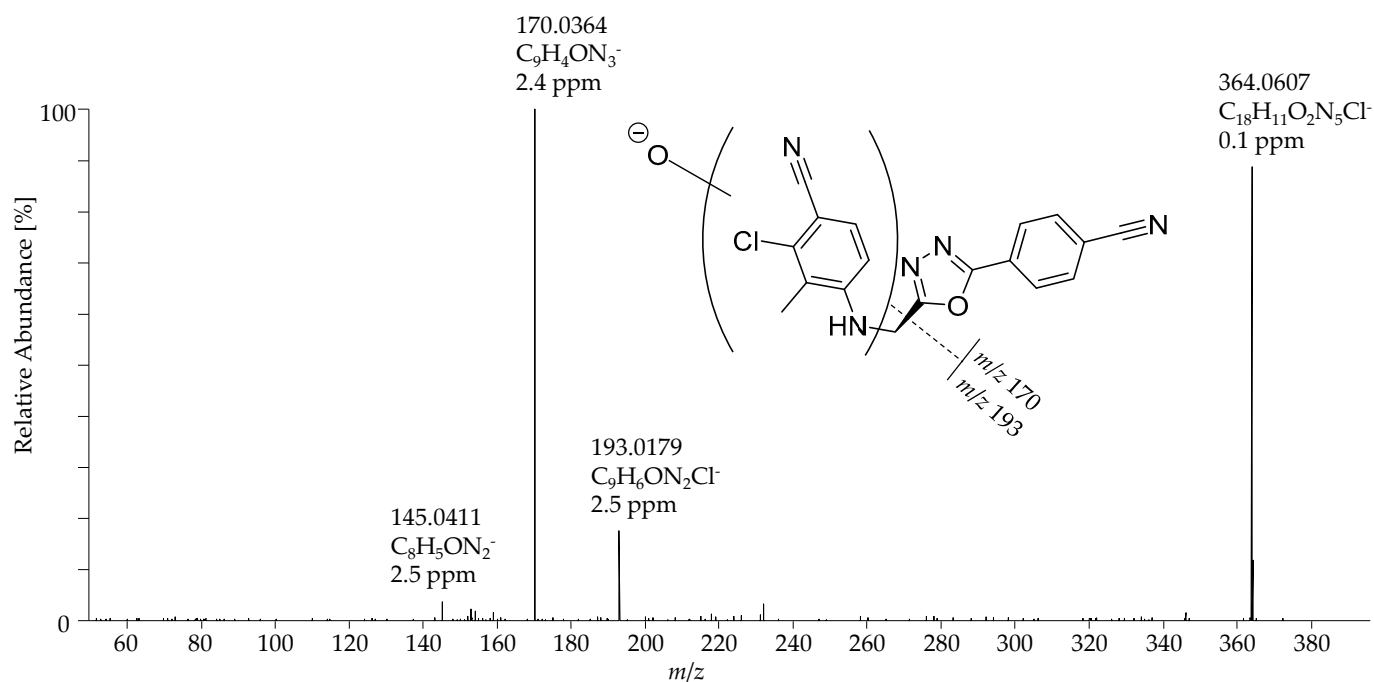

**Figure S9.** HRMS/MS spectrum and structure of M6a, sample: RDS, urine sample was diluted 1:10 with water and prepared by hydrolysis and LLE. NCE 15%, isolation window  $m/z$  1.

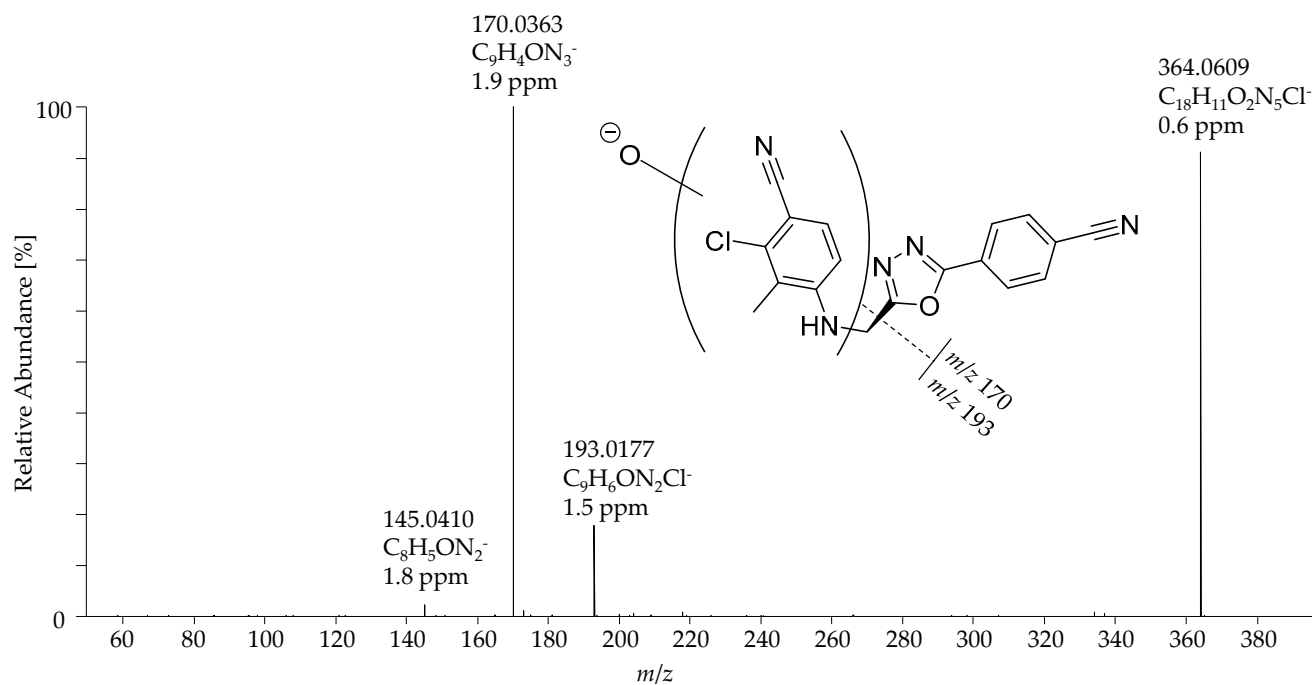

**Figure S10.** HRMS/MS spectrum and structure of M6b, sample: RDS, urine sample was diluted 1:10 with water and prepared by hydrolysis and LLE. NCE 15%, isolation window  $m/z$  1.

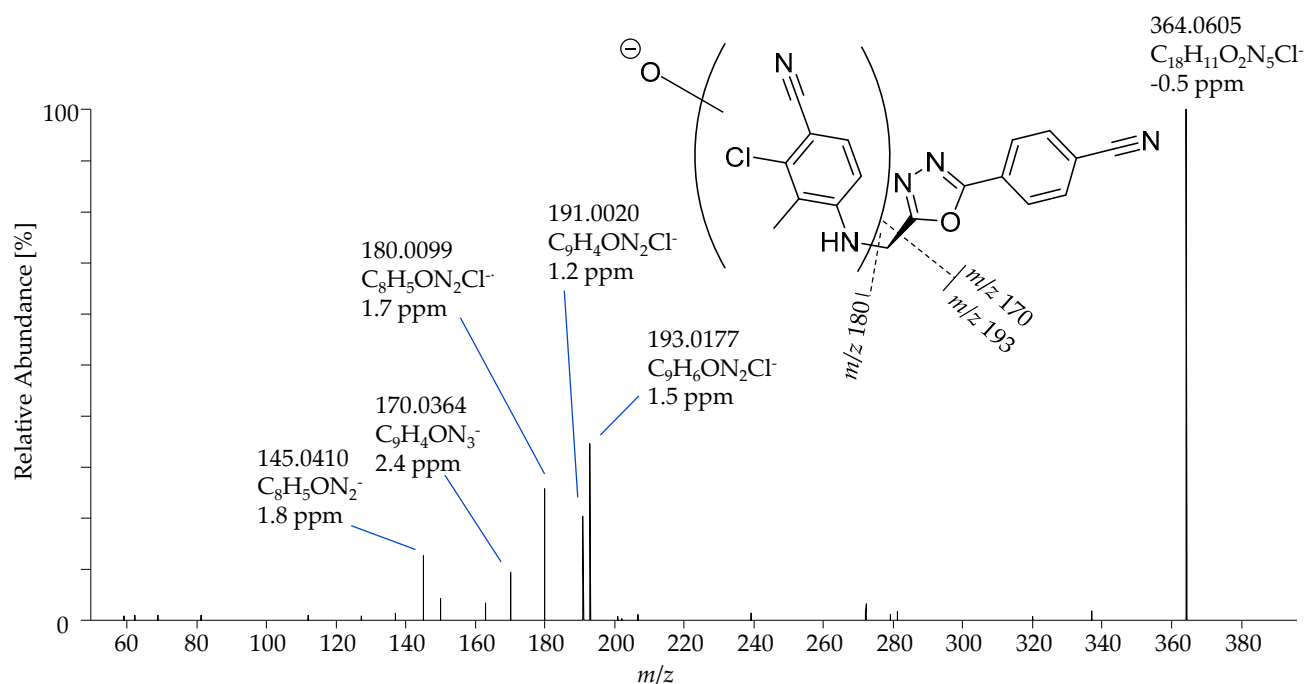

**Figure S11.** HRMS/MS spectrum and structure of M6c, sample: RDS, urine sample was diluted 1:10 with water and prepared by hydrolysis and LLE. NCE 20%, isolation window  $m/z$  1.

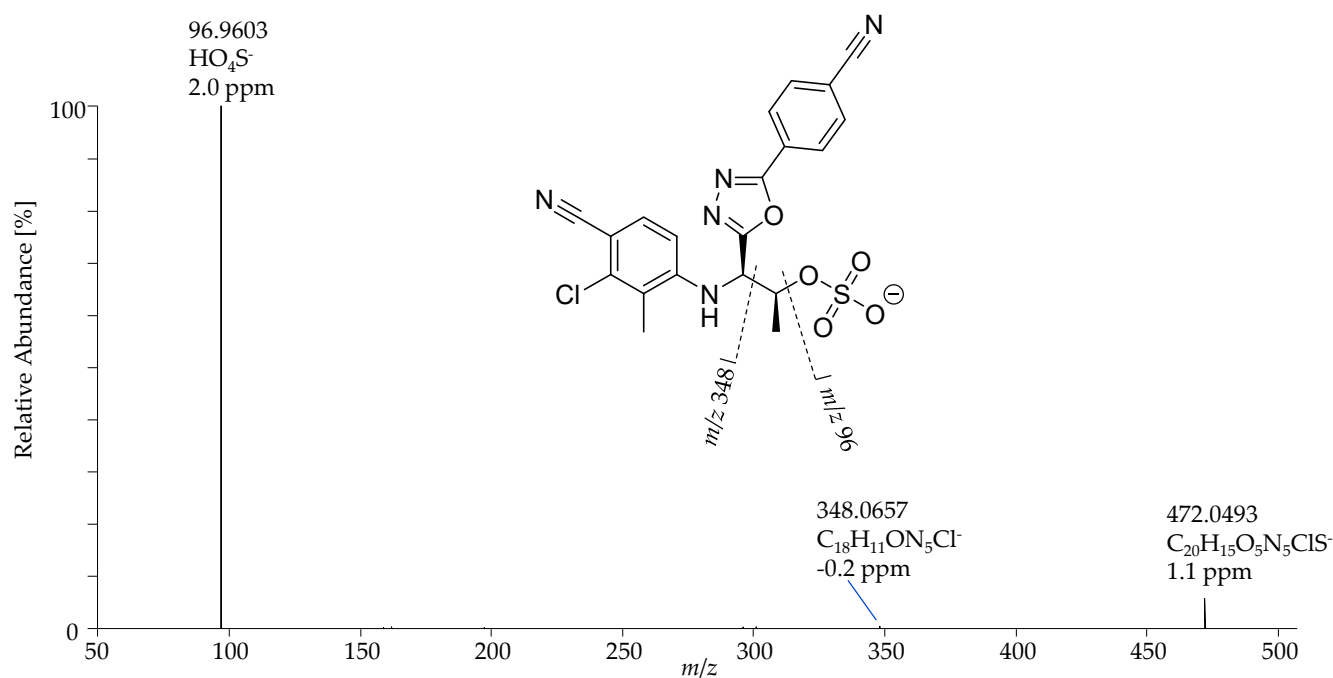

**Figure S12.** HRMS/MS spectrum and postulated structure of M7, sample: RDS, urine sample was injected directly. NCE 25%, isolation window  $m/z$  1.



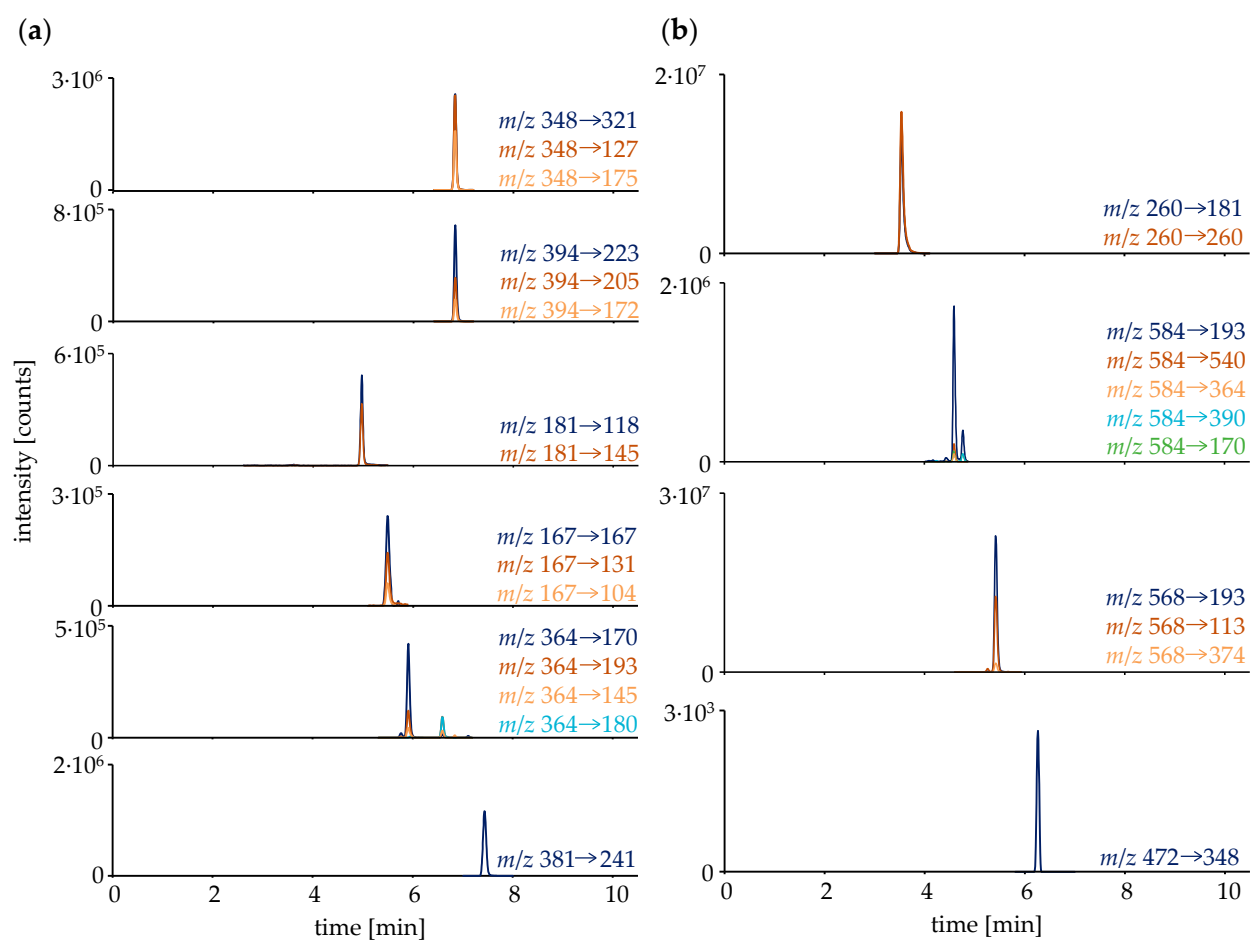

**Figure S13.** Chromatograms of RDS (a) after hydrolysis after 1:10 dilution (b) after direct injection.

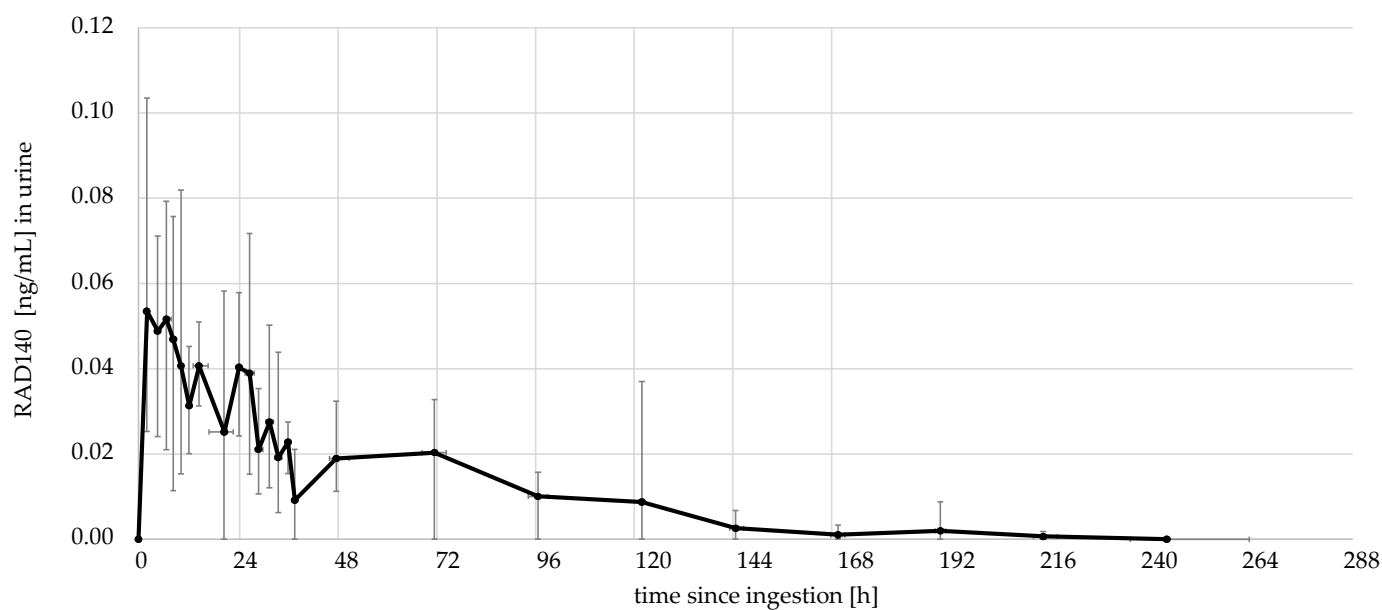

**Figure S14.** Elimination profile of RAD140 after the intake of a single dose of 1 µg RAD140. The black line indicates the average values of the five volunteers, minimum and maximum values are shown as error bars.

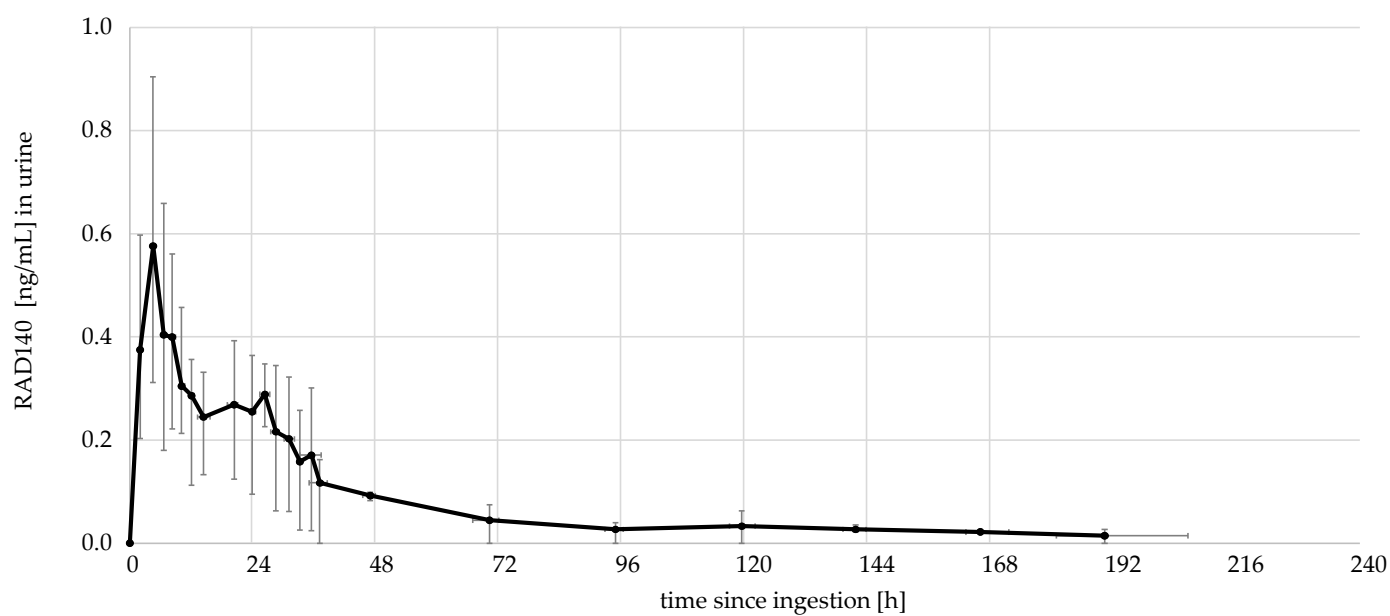

**Figure S15.** Elimination profile of RAD140 after the intake of a single dose of 10 µg RAD140. The black line indicates the average values of the five volunteers, minimum and maximum values are shown as error bars.

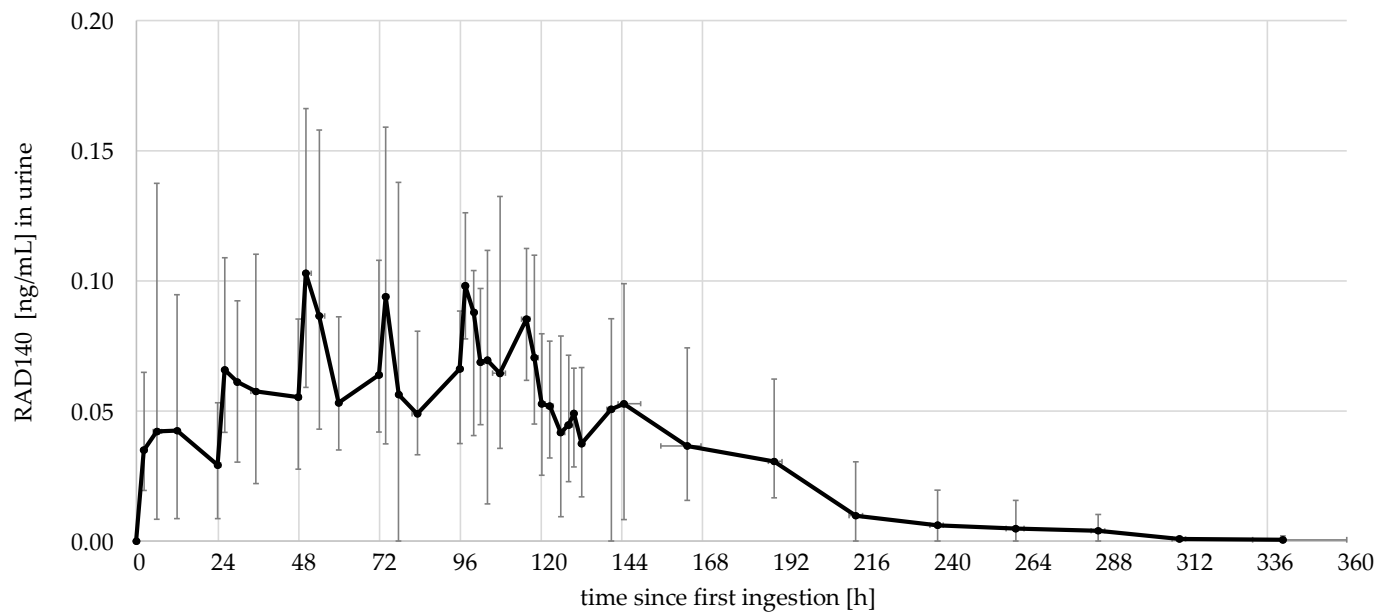

**Figure S16.** Elimination profile of RAD140 after the intake of five doses of 1 µg RAD140 over 5 days. The black line indicates the average values of the five volunteers, minimum and maximum values are shown as error bars.

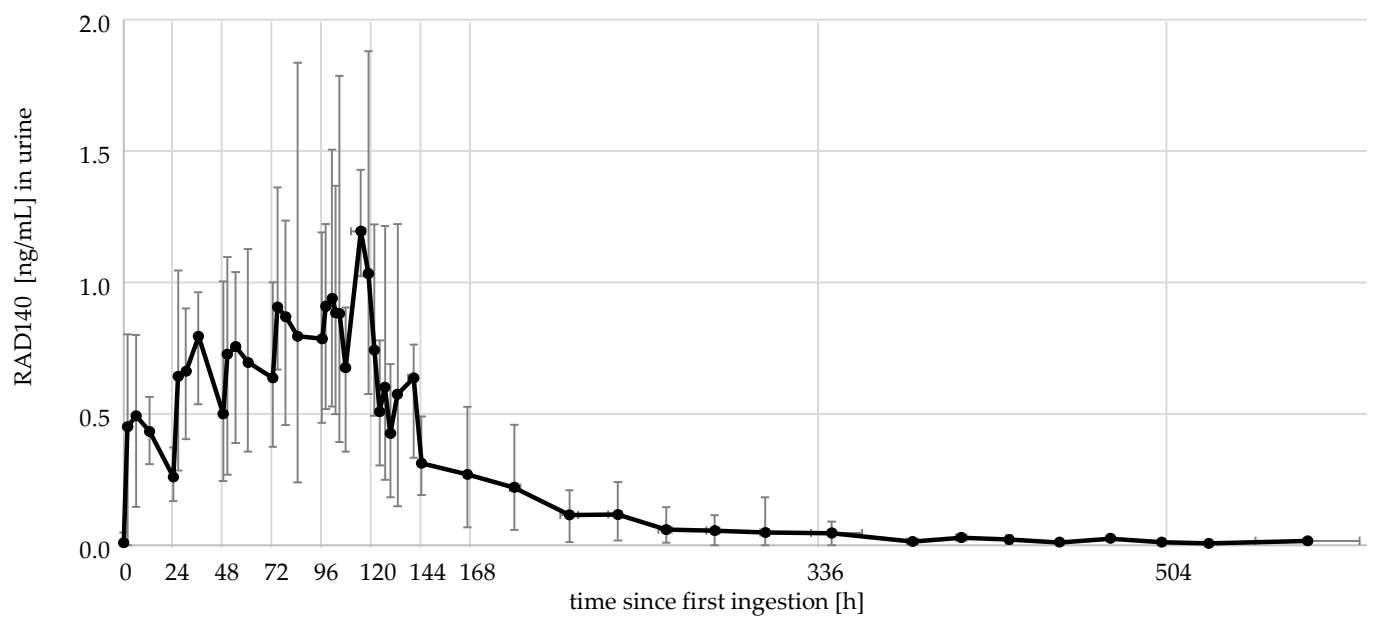

**Figure S17.** Elimination profile of RAD140 after the intake of five doses of 10 µg RAD140 over 5 days. The black line indicates the average values of the five volunteers, minimum and maximum values are shown as error bars.

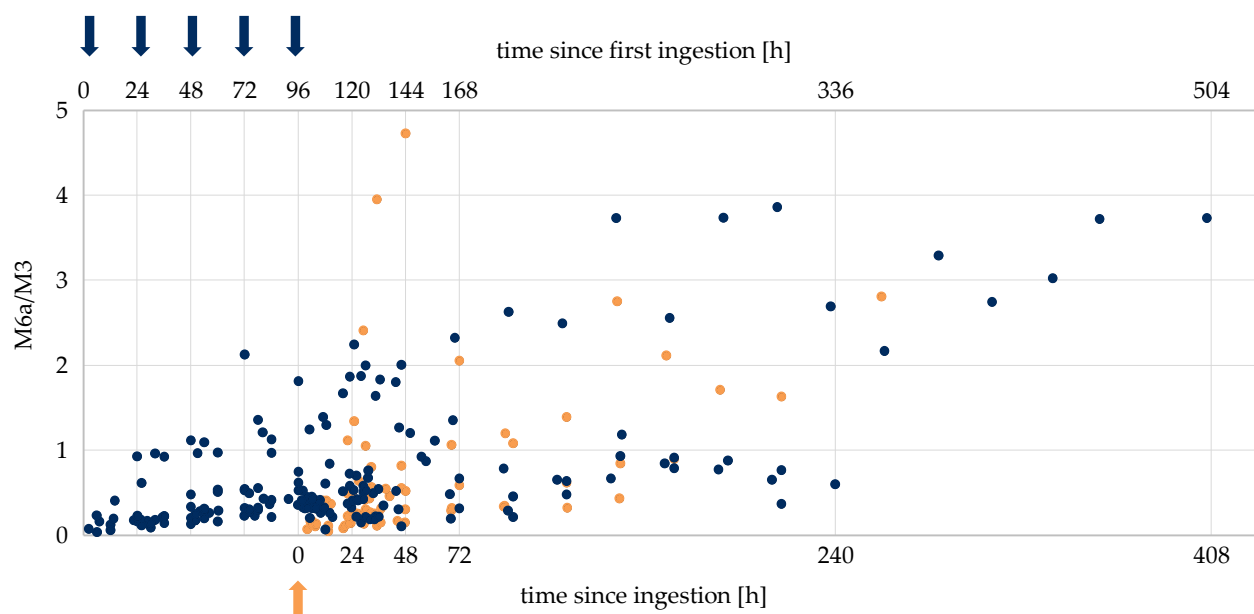

**Figure S18.** Metabolite ratios  $M6a/M3$  of single application of RAD140 (orange) and multi-dose application of RAD140 (blue). Arrows indicate the intake of 50  $\mu\text{g}$  RAD140.

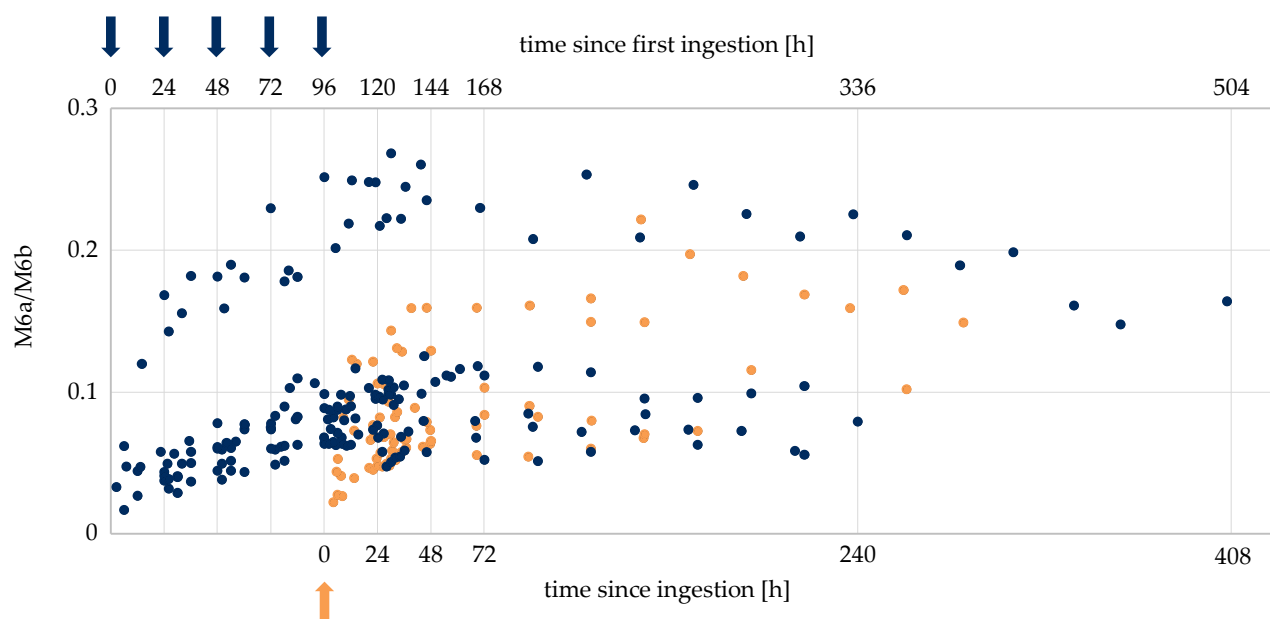

**Figure S19.** Metabolite ratios  $M6a/M6b$  of single application of RAD140 (orange) and multi-dose application of RAD140 (blue). Arrows indicate the intake of 50  $\mu\text{g}$  RAD140.

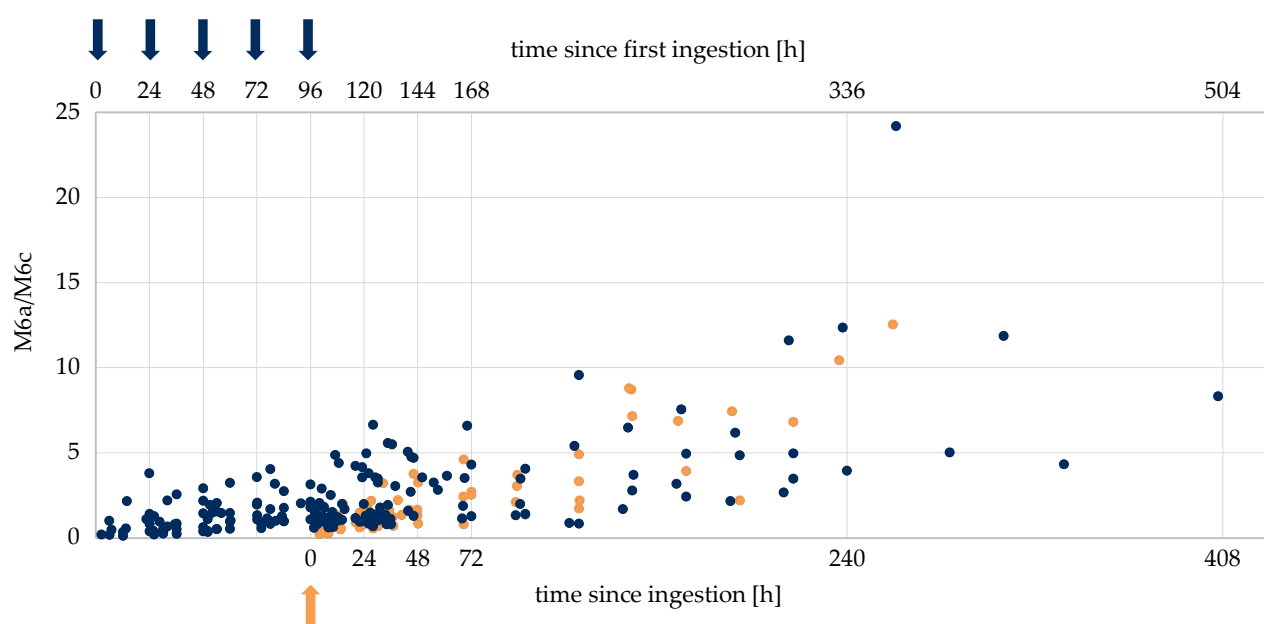

**Figure S20.** Metabolite ratios  $M6a/M6c$  of single application of RAD140 (orange) and multi-dose application of RAD140 (blue). Arrows indicate the intake of 50  $\mu\text{g}$  RAD140.

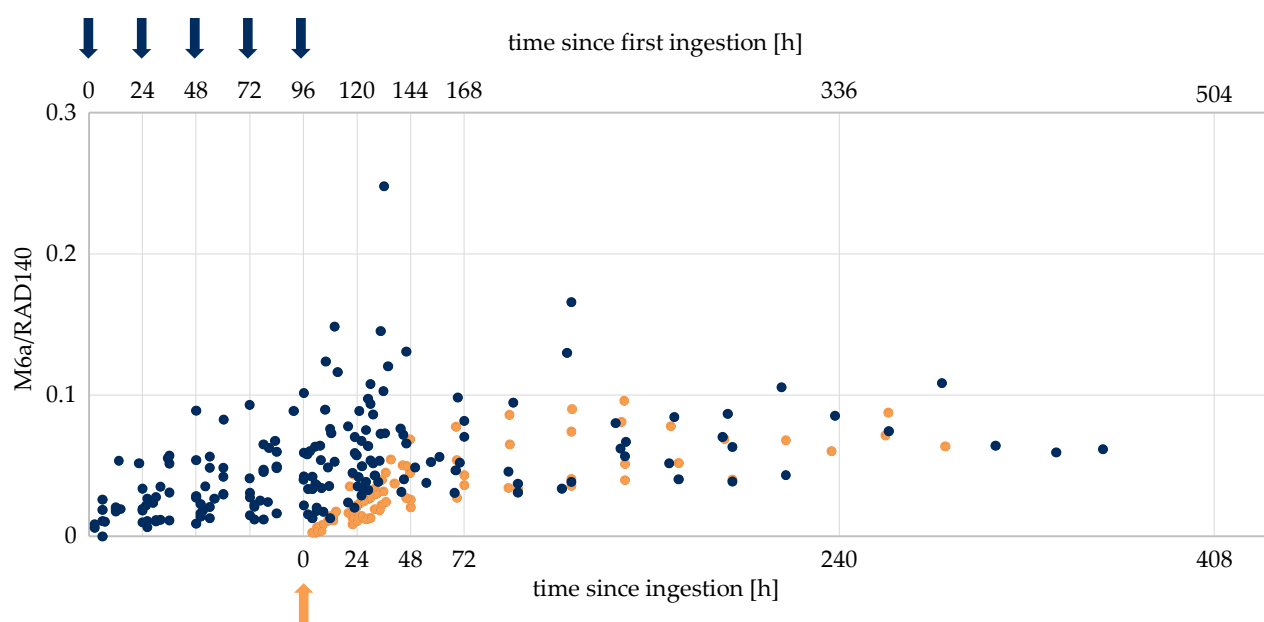

**Figure S21.** Metabolite ratios  $M6a/RAD140$  of single application of RAD140 (orange) and multi-dose application of RAD140 (blue). Arrows indicate the intake of 50  $\mu\text{g}$  RAD140.

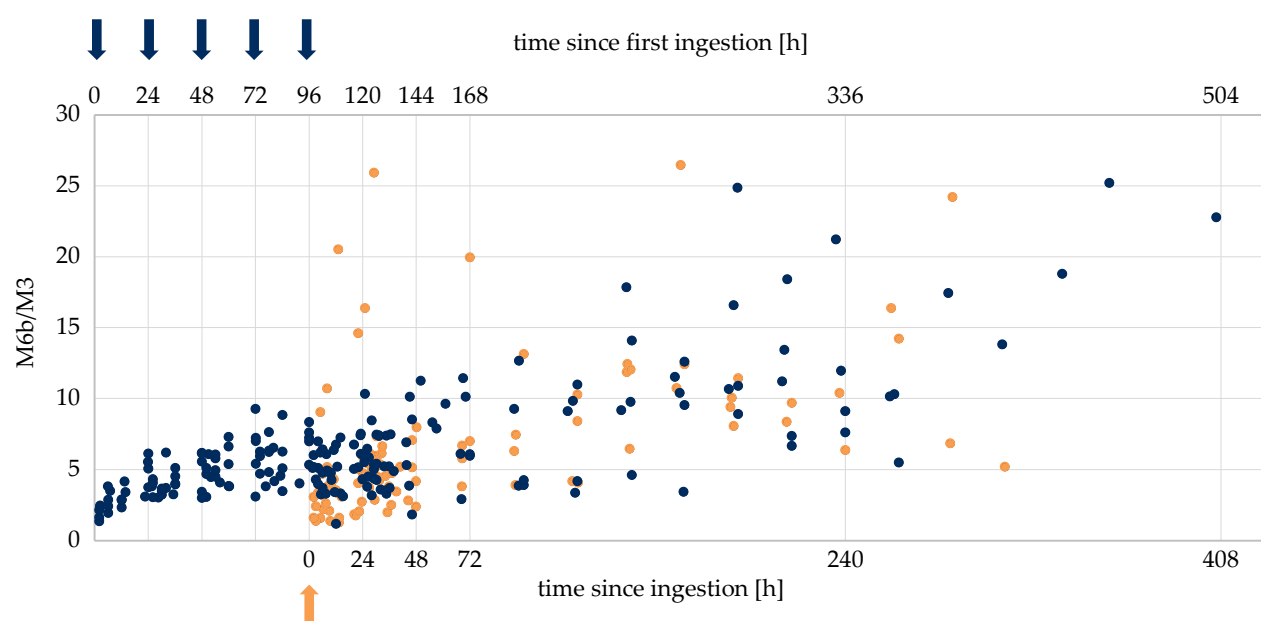

**Figure S22.** Metabolite ratios  $M6b/M3$  of single application of RAD140 (orange) and multi-dose application of RAD140 (blue). Arrows indicate the intake of 50  $\mu\text{g}$  RAD140.

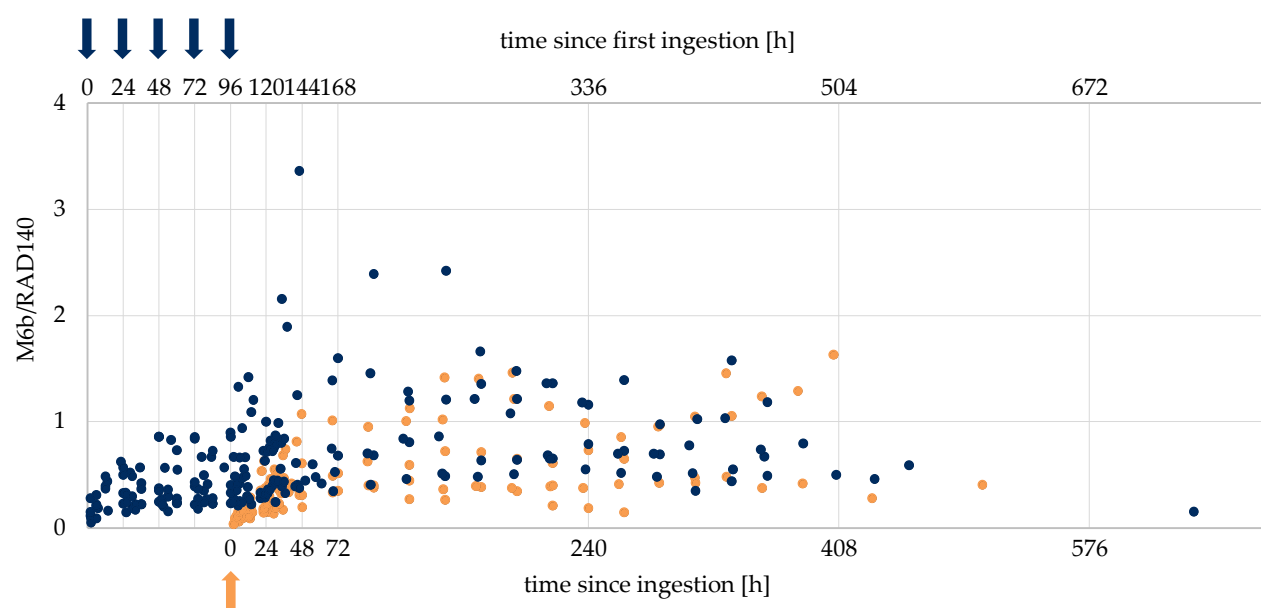

**Figure S23.** Metabolite ratios  $M6b/RAD140$  of single application of RAD140 (orange) and multi-dose application of RAD140 (blue). Arrows indicate the intake of 50  $\mu\text{g}$  RAD140.
